# Supplementary material for: Iron complexes of a bidentate picolyl-NHC ligand: synthesis, structure and reactivity
Source: Royal Society of Chemistry journal article supplement (doi:10.1039/c6dt02792j), 2016-01-01
Supplement: c6dt02792j1.pdf [file c6dt02792j1.pdf]

**Supplementary Information for**

**Iron Complexes of a Bidentate Picolyl–NHC Ligand: Synthesis,  
Structure and Reactivity**

Qiuming Liang, Trevor Janes, Xhoana Gjergji and Datong Song\*

*Davenport Chemical Research Laboratories, Department of Chemistry, University of Toronto*

*80 St. George Street, Toronto, Ontario, Canada, M5S 3H6*

E-mail: [dsong@chem.utoronto.ca](mailto:dsong@chem.utoronto.ca); Tel: +1 416 978 7014; Fax: +1 416 978 7013

|                                       |     |
|---------------------------------------|-----|
| 1. <b>X-ray crystallography</b> ..... | S2  |
| 2. <b>NMR spectra</b> .....           | S4  |
| 3. <b>IR spectra</b> .....            | S9  |
| 4. <b>C-C coupling reaction</b> ..... | S11 |
| 5. <b>References</b> .....            | S14 |

## 1. X-ray Crystallography

The X-ray diffraction data were collected on a Bruker Kappa Apex II diffractometer with graphite-monochromated Mo K $\alpha$  radiation ( $\lambda = 0.71073 \text{ \AA}$ ) at 150 K controlled by an Oxford Cryostream 700 series low-temperature system and processed with the Bruker Apex 2 software package.<sup>1</sup> The structures were solved by direct methods and refined using SHELX-2013 and SHELX-2014 software packages.<sup>2,3</sup> All non-hydrogen atoms were refined anisotropically, except for those involved in the disordered THF molecules in the lattice of **1**. All hydrogen atoms were calculated using the riding model. The disordered THF molecules in the lattice of **1** were successfully modeled using two sets of coordinates with the occupancies constrained to a 1:1 ratio. The diffuse residual electron density from solvent molecules in the lattice of **4** was removed with the SQUEEZE function of PLATON<sup>4</sup> and was not included in the formula or the refinement. Selected crystallographic data are summarized in Tables S1–S2.

**Table S1.** Selected crystallographic data for compounds **1–4**.

|                                          | <b>1·(2THF)</b>                                                                  | <b>2</b>                                                            | <b>3</b>                                                          | <b>4</b>                                         |
|------------------------------------------|----------------------------------------------------------------------------------|---------------------------------------------------------------------|-------------------------------------------------------------------|--------------------------------------------------|
| Empirical formula                        | C <sub>44</sub> H <sub>54</sub> N <sub>6</sub> O <sub>2</sub> Br <sub>2</sub> Fe | C <sub>24</sub> H <sub>37</sub> N <sub>4</sub> BrSi <sub>2</sub> Fe | C <sub>18</sub> H <sub>19</sub> N <sub>3</sub> Br <sub>2</sub> Fe | C <sub>36</sub> H <sub>36</sub> FeN <sub>6</sub> |
| FW (g·mol <sup>-1</sup> )                | 914.60                                                                           | 573.51                                                              | 493.03                                                            | 608.56                                           |
| Crystal system                           | Monoclinic                                                                       | Triclinic                                                           | Monoclinic                                                        | Monoclinic                                       |
| Space Group                              | P 2 <sub>1</sub> /n                                                              | P -1                                                                | P 2 <sub>1</sub> /n                                               | I 2/a                                            |
| Z                                        | 4                                                                                | 4                                                                   | 4                                                                 | 8                                                |
| a (Å)                                    | 17.771(1)                                                                        | 9.9454(9)                                                           | 11.9641(7)                                                        | 22.229(2)                                        |
| b (Å)                                    | 10.0076(8)                                                                       | 16.077(1)                                                           | 10.4299(6)                                                        | 9.3929(6)                                        |
| c (Å)                                    | 25.439(2)                                                                        | 19.406(2)                                                           | 16.3971(9)                                                        | 32.344(3)                                        |
| $\alpha$ (deg)                           | 90                                                                               | 65.934(4)                                                           | 90                                                                | 90                                               |
| $\beta$ (deg)                            | 108.204(3)                                                                       | 84.261(6)                                                           | 110.354(3)                                                        | 108.287(6)                                       |
| $\gamma$ (deg)                           | 90                                                                               | 89.170(4)                                                           | 90                                                                | 90                                               |
| V (Å <sup>3</sup> )                      | 4297.7(5)                                                                        | 2817.8(4)                                                           | 1918.4(2)                                                         | 6701(1)                                          |
| D <sub>calcd</sub> (g·cm <sup>-3</sup> ) | 1.414                                                                            | 1.352                                                               | 1.707                                                             | 1.206                                            |
| $\mu$ (mm <sup>-1</sup> )                | 2.253                                                                            | 2.057                                                               | 4.956                                                             | 0.483                                            |
| F(000)                                   | 1888                                                                             | 1192                                                                | 976                                                               | 2560                                             |
| no. of obsd rflns                        | 5883                                                                             | 6521                                                                | 2728                                                              | 4336                                             |
| no. of params refnd                      | 493                                                                              | 595                                                                 | 220                                                               | 394                                              |
| goodness of fit                          | 1.053                                                                            | 1.098                                                               | 1.020                                                             | 1.069                                            |
| R <sub>1</sub> (I > 2 $\sigma$ )         | 0.0545                                                                           | 0.0855                                                              | 0.0305                                                            | 0.0490                                           |
| wR <sub>2</sub> (I > 2 $\sigma$ )        | 0.1657                                                                           | 0.2007                                                              | 0.0705                                                            | 0.1232                                           |

**Table S2.** Selected crystallographic data for compounds **5–8**.

|                                                   | <b>5</b>                                           | <b>6</b>                                          | <b>7</b>                                                        | <b>8</b>                                                        |
|---------------------------------------------------|----------------------------------------------------|---------------------------------------------------|-----------------------------------------------------------------|-----------------------------------------------------------------|
| Empirical formula                                 | C <sub>25</sub> H <sub>26</sub> BrFeN <sub>3</sub> | C <sub>32</sub> H <sub>33</sub> Fe N <sub>3</sub> | C <sub>21</sub> H <sub>19</sub> FeN <sub>3</sub> O <sub>3</sub> | C <sub>22</sub> H <sub>19</sub> FeN <sub>3</sub> O <sub>4</sub> |
| FW (g·mol <sup>-1</sup> )                         | 504.25                                             | 515.46                                            | 417.24                                                          | 445.25                                                          |
| Crystal system                                    | Triclinic                                          | Triclinic                                         | Monoclinic                                                      | Monoclinic                                                      |
| Space Group                                       | P-1                                                | P-1                                               | P2 <sub>1</sub> /n                                              | P2 <sub>1</sub> /c                                              |
| <i>Z</i>                                          | 2                                                  | 2                                                 | 4                                                               | 4                                                               |
| <i>a</i> (Å)                                      | 8.041(2)                                           | 9.2244(9)                                         | 15.764(2)                                                       | 12.795(1)                                                       |
| <i>b</i> (Å)                                      | 10.612(2)                                          | 9.846(1)                                          | 8.828(1)                                                        | 13.232(1)                                                       |
| <i>c</i> (Å)                                      | 14.202(3)                                          | 15.696(1)                                         | 16.118(2)                                                       | 12.3477(9)                                                      |
| $\alpha$ (deg)                                    | 103.803(7)                                         | 94.162(4)                                         | 90                                                              | 90                                                              |
| $\beta$ (deg)                                     | 96.614(8)                                          | 104.009(4)                                        | 118.981(6)                                                      | 94.594(4)                                                       |
| $\gamma$ (deg)                                    | 91.387(8)                                          | 96.291(4)                                         | 90                                                              | 90                                                              |
| <i>V</i> (Å <sup>3</sup> )                        | 1167.4(4)                                          | 1367.5(2)                                         | 1962.3(5)                                                       | 2083.8(3)                                                       |
| <i>D</i> <sub>calcd</sub> , (g·cm <sup>-3</sup> ) | 1.434                                              | 1.252                                             | 1.412                                                           | 1.419                                                           |
| $\mu$ (mm <sup>-1</sup> )                         | 2.373                                              | 0.576                                             | 0.795                                                           | 0.757                                                           |
| <i>F</i> (000)                                    | 516                                                | 544                                               | 864                                                             | 920                                                             |
| no. of obsd reflns                                | 2326                                               | 4338                                              | 3381                                                            | 3689                                                            |
| no. of params refnd                               | 274                                                | 328                                               | 256                                                             | 274                                                             |
| goodness of fit                                   | 0.986                                              | 1.012                                             | 1.067                                                           | 1.016                                                           |
| R <sub>1</sub> (I>2 $\sigma$ )                    | 0.0495                                             | 0.0445                                            | 0.0378                                                          | 0.0329                                                          |
| wR <sub>2</sub> (I>2 $\sigma$ )                   | 0.1011                                             | 0.0838                                            | 0.0961                                                          | 0.0747                                                          |

## 2. NMR spectra

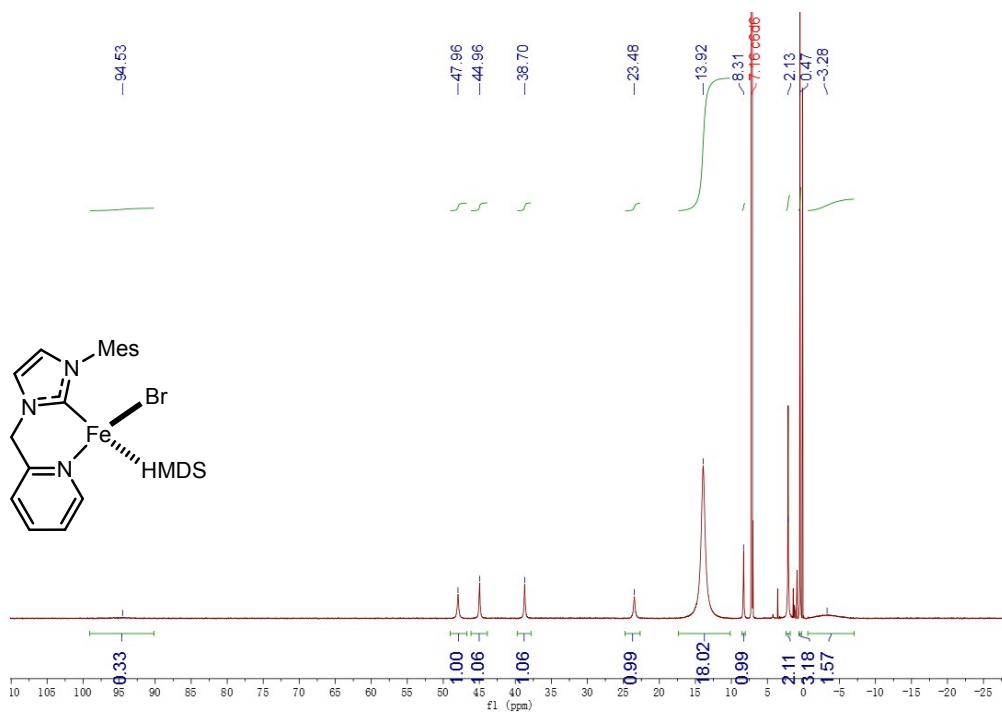

Figure S1. <sup>1</sup>H NMR (600 MHz, C<sub>6</sub>D<sub>6</sub>) spectrum of [FeBr(HL)(HMDS)] (2).

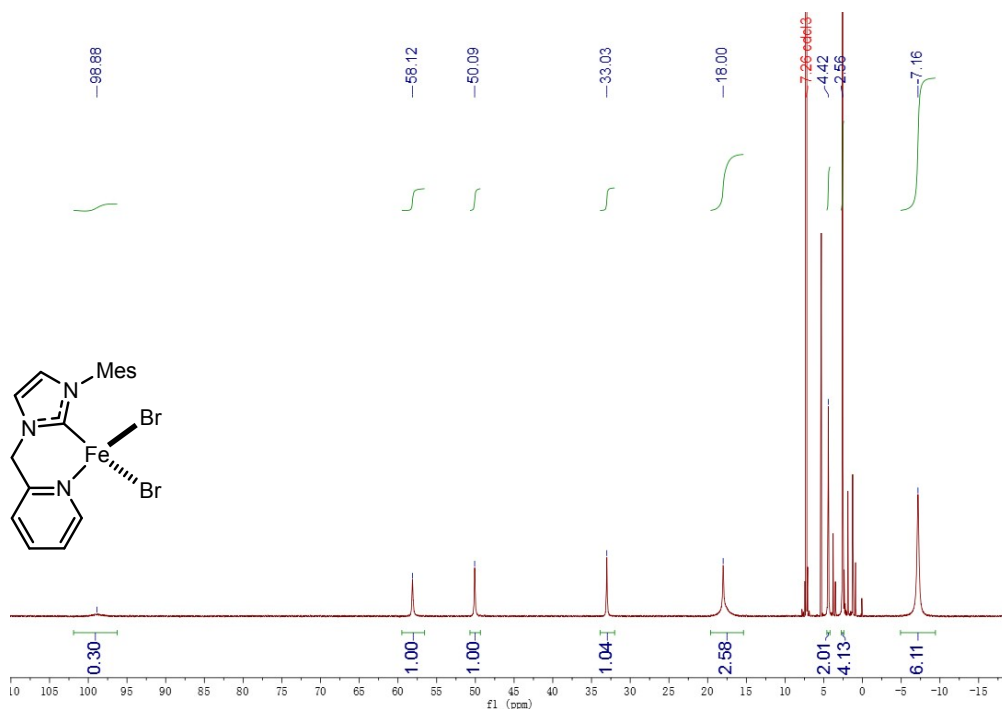

Figure S2. <sup>1</sup>H NMR (600 MHz, CDCl<sub>3</sub>) spectrum of [FeBr<sub>2</sub>(HL)] (3).

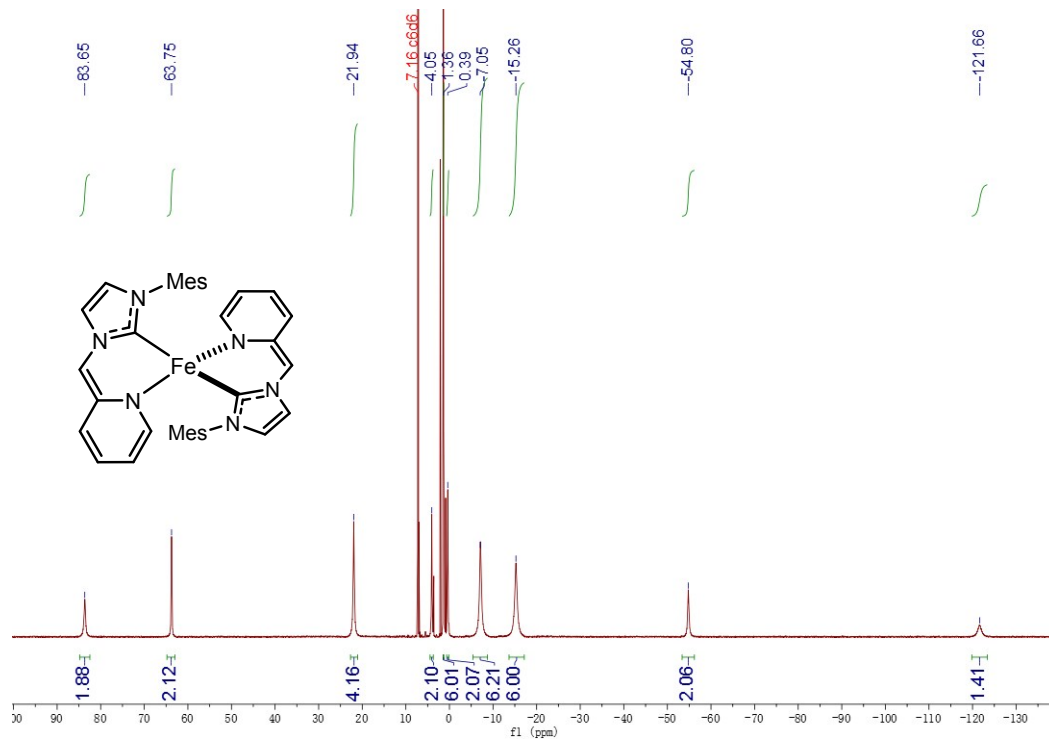

**Figure S3.**  $^1\text{H}$  NMR (600 MHz,  $\text{C}_6\text{D}_6$ ) spectrum of  $\text{FeL}_2$  (**4**).

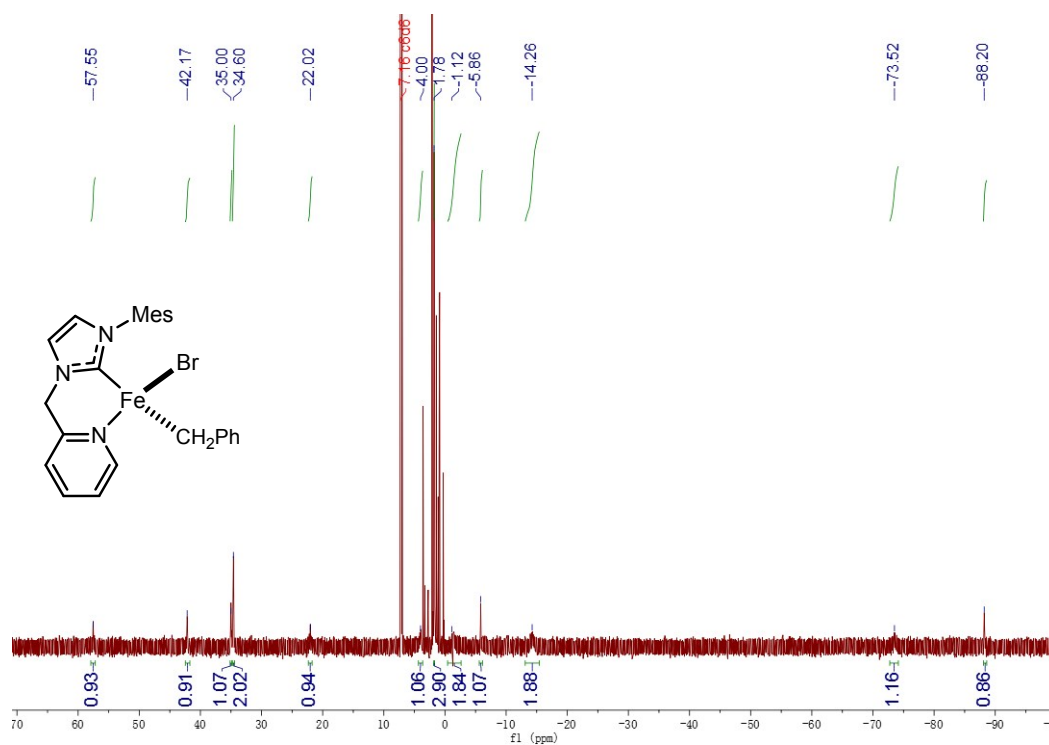

**Figure S4.**  $^1\text{H}$  NMR (600 MHz,  $\text{C}_6\text{D}_6$ ) spectrum of  $[\text{FeBnBr}(\text{HL})]$  (**5**). Note: the poor quality of the spectrum is due to low solubility.

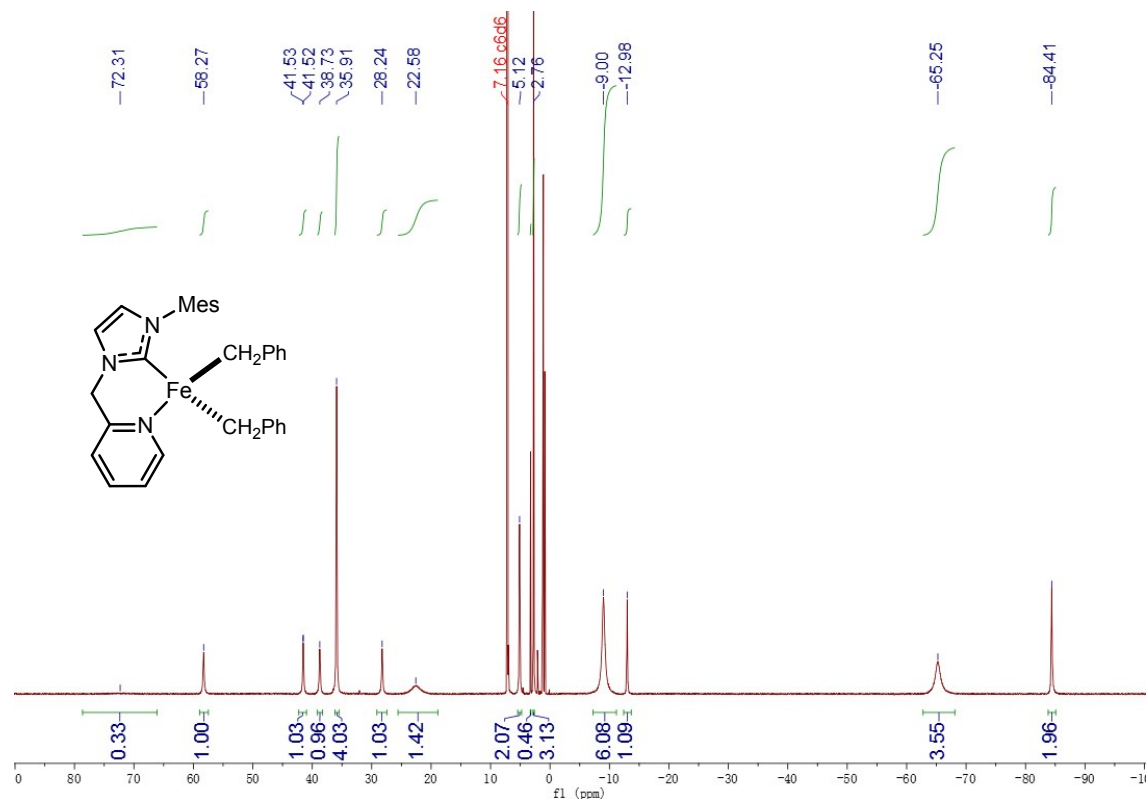

Figure S5.  $^1\text{H}$  NMR (600 MHz,  $\text{C}_6\text{D}_6$ ) spectrum of  $[\text{Fe}(\text{Bn})_2(\text{HL})]$  (6).

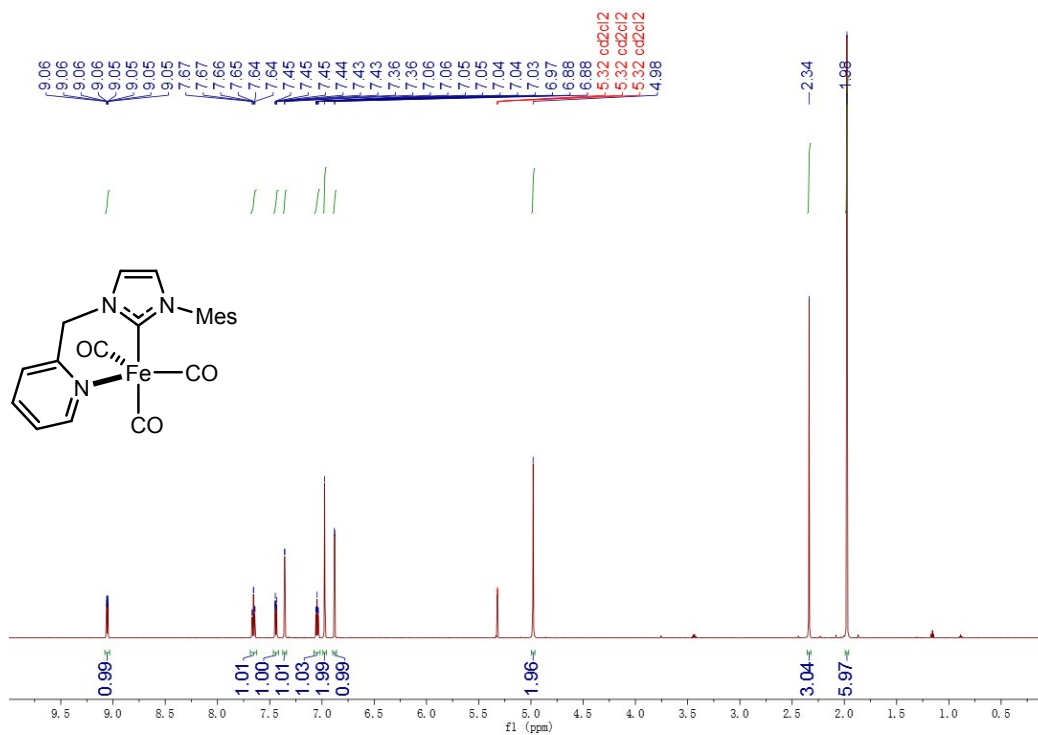

Figure S6.  $^1\text{H}$  NMR (600 MHz,  $\text{CD}_2\text{Cl}_2$ ) spectrum of  $[\text{Fe}(\text{CO})_3(\text{HL})]$  (7).

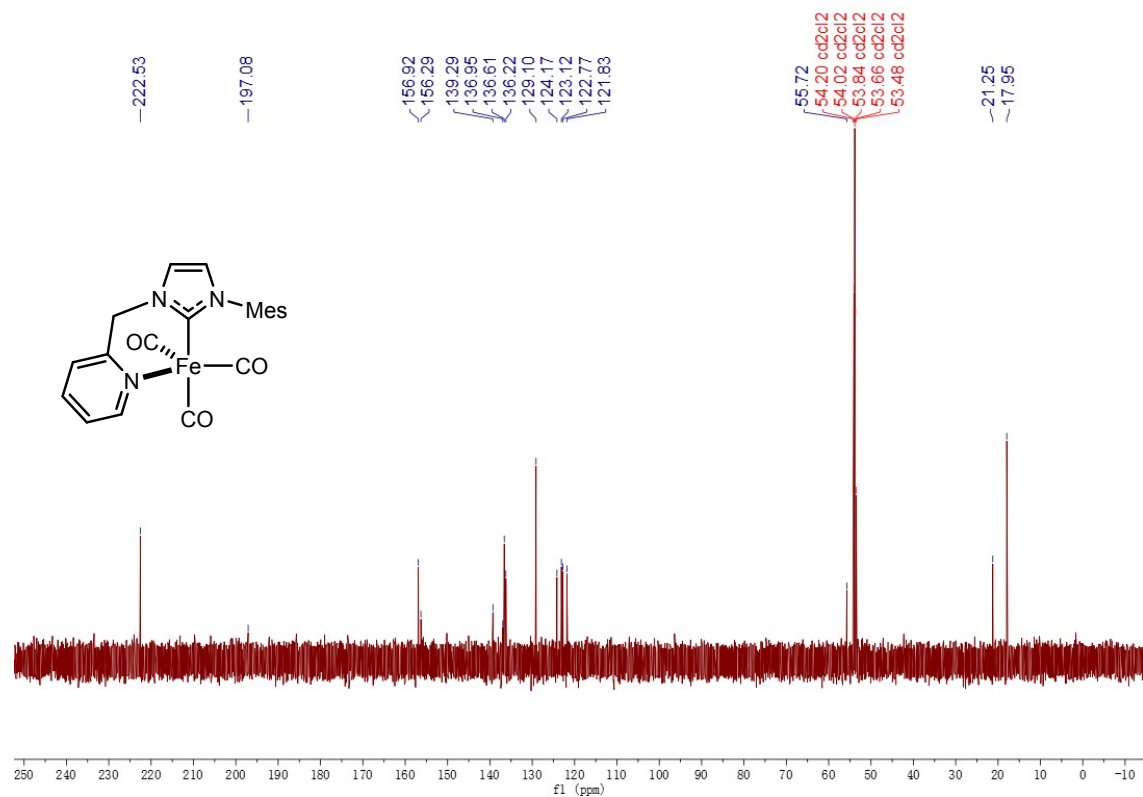

Figure S7.  $^{13}\text{C}$  NMR (151 MHz,  $\text{CD}_2\text{Cl}_2$ ) spectrum of  $[\text{Fe}(\text{CO})_3(\text{HL})]$  (7).

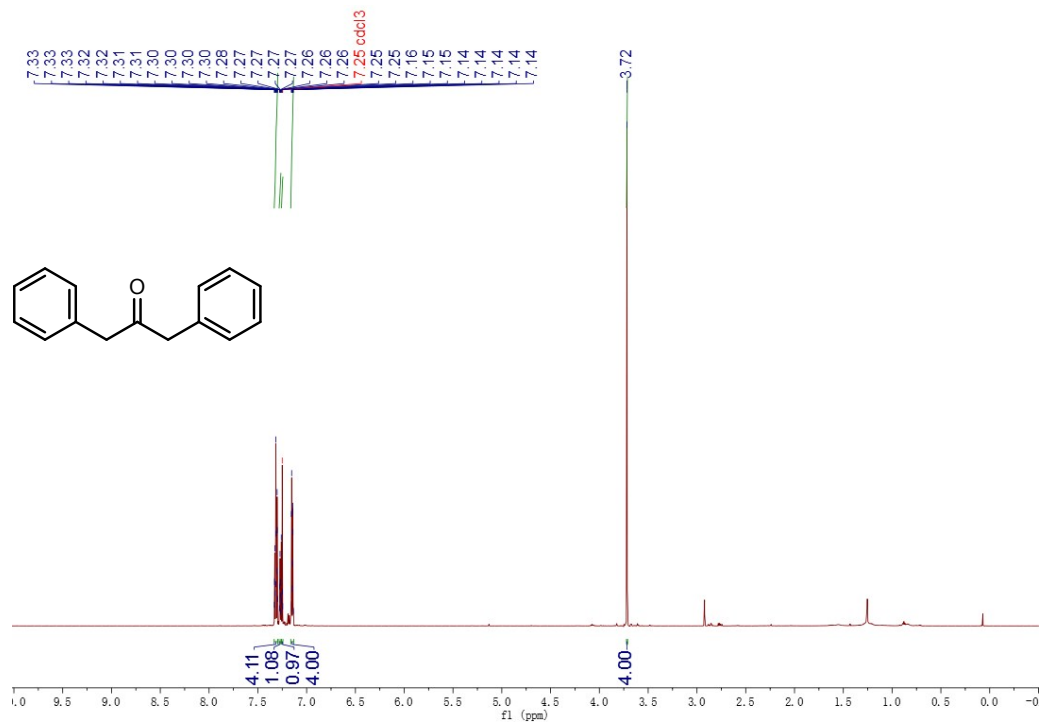

Figure S8.  $^1\text{H}$  NMR (600 MHz,  $\text{CDCl}_3$ ) spectrum of dibenzyl ketone.

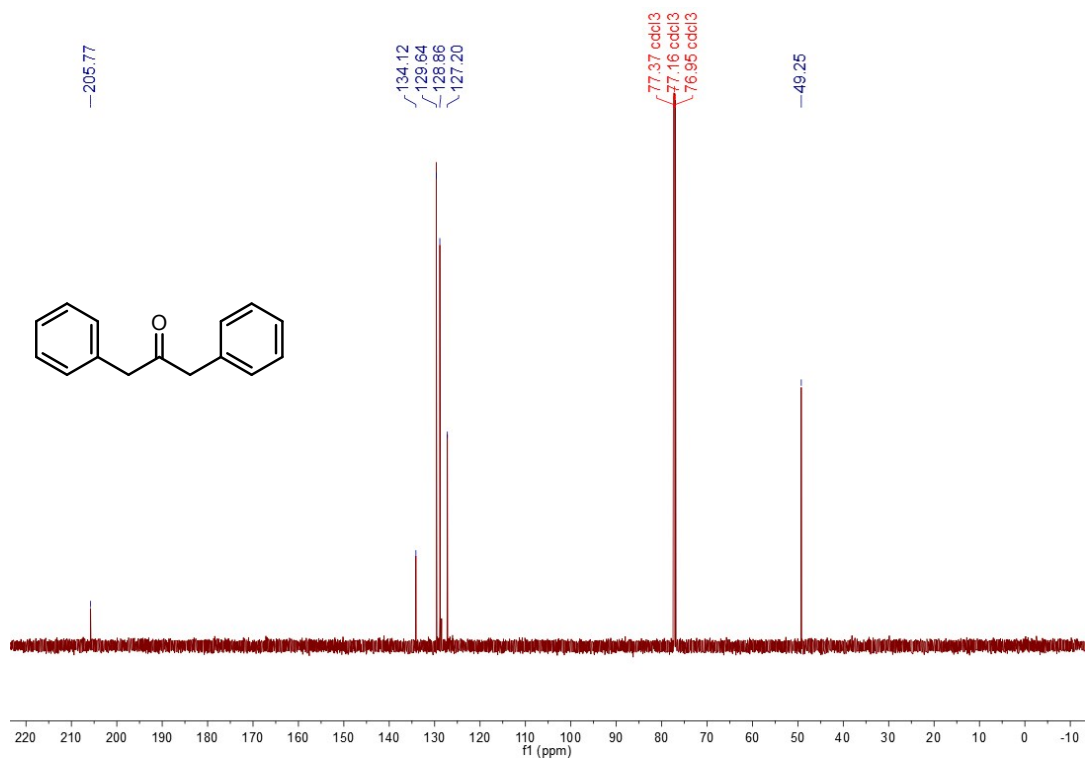

Figure S9. <sup>13</sup>C NMR (151 MHz, CDCl<sub>3</sub>) spectrum of dibenzyl ketone.

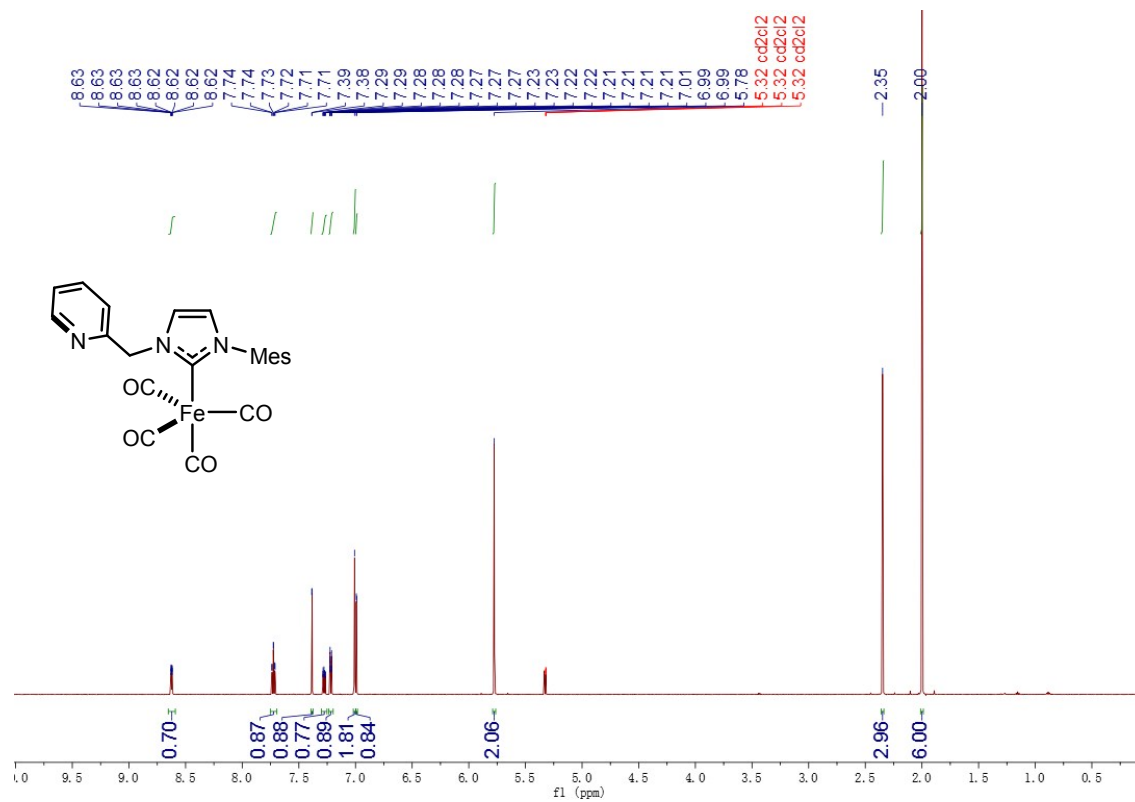

Figure S10. <sup>1</sup>H NMR (600 MHz, CD<sub>2</sub>Cl<sub>2</sub>) spectrum of [Fe(CO)<sub>4</sub>(HL)] (**8**).



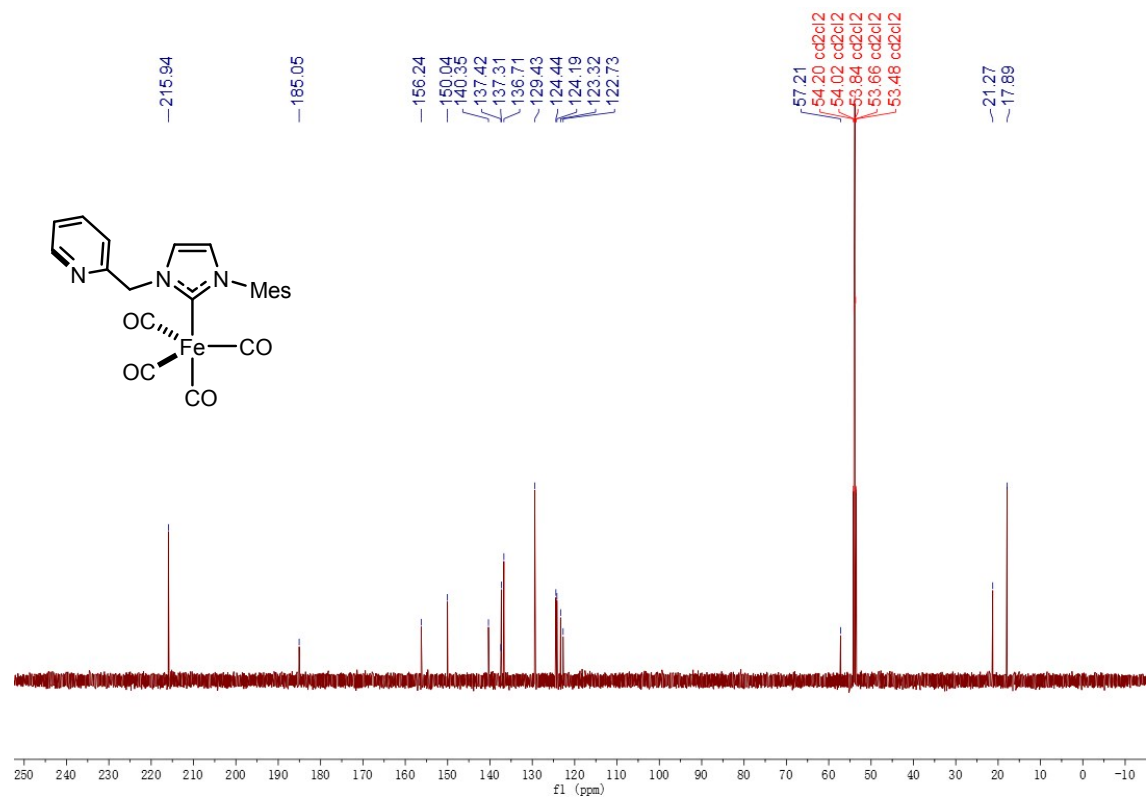

Figure S11.  $^{13}\text{C}$  NMR (151 MHz,  $\text{CD}_2\text{Cl}_2$ ) spectrum of  $[\text{Fe}(\text{CO})_4(\text{HL})]$  (8).

### 3. IR spectra

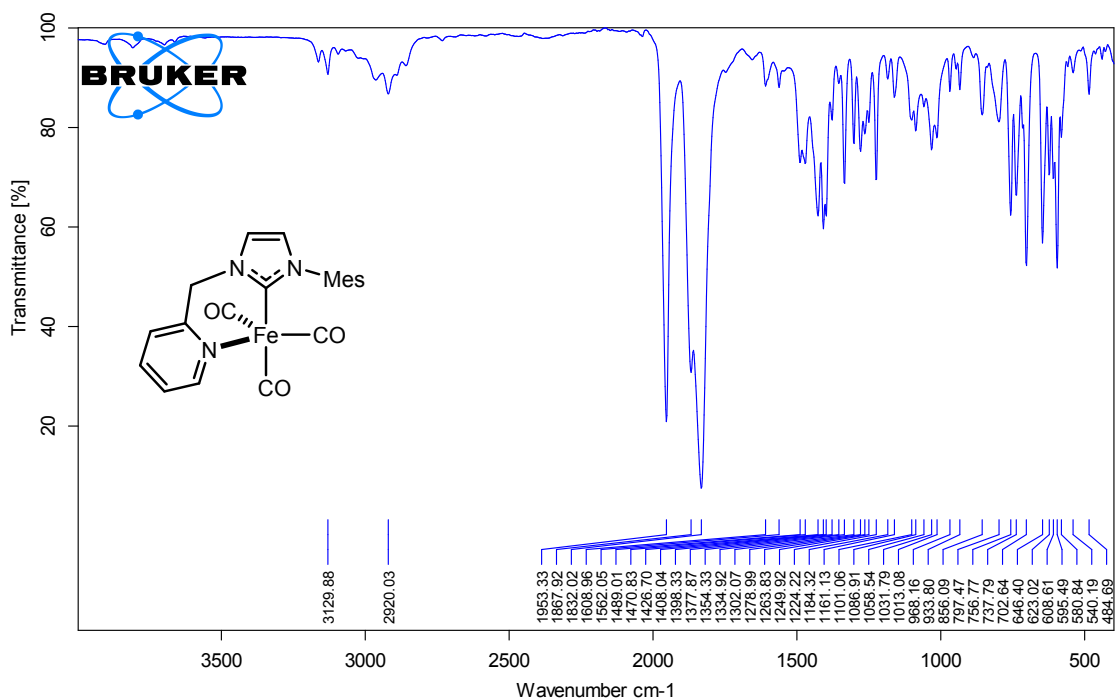

Figure S12. IR spectrum of  $[\text{Fe}(\text{CO})_3(\text{HL})]$  (7) as a neat solid.

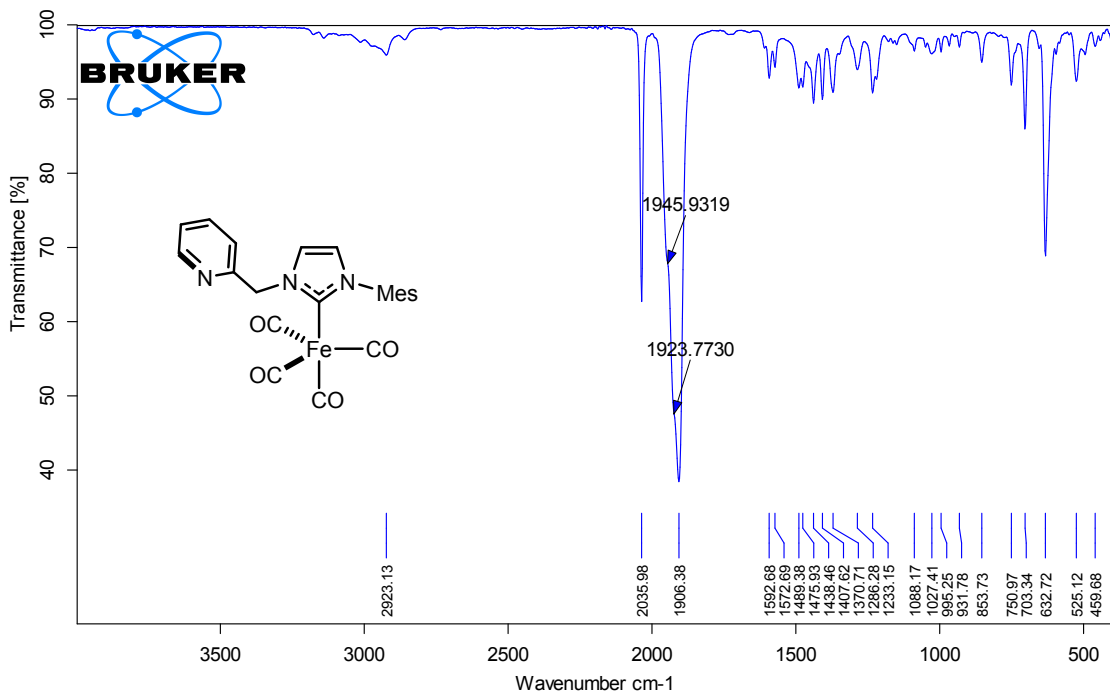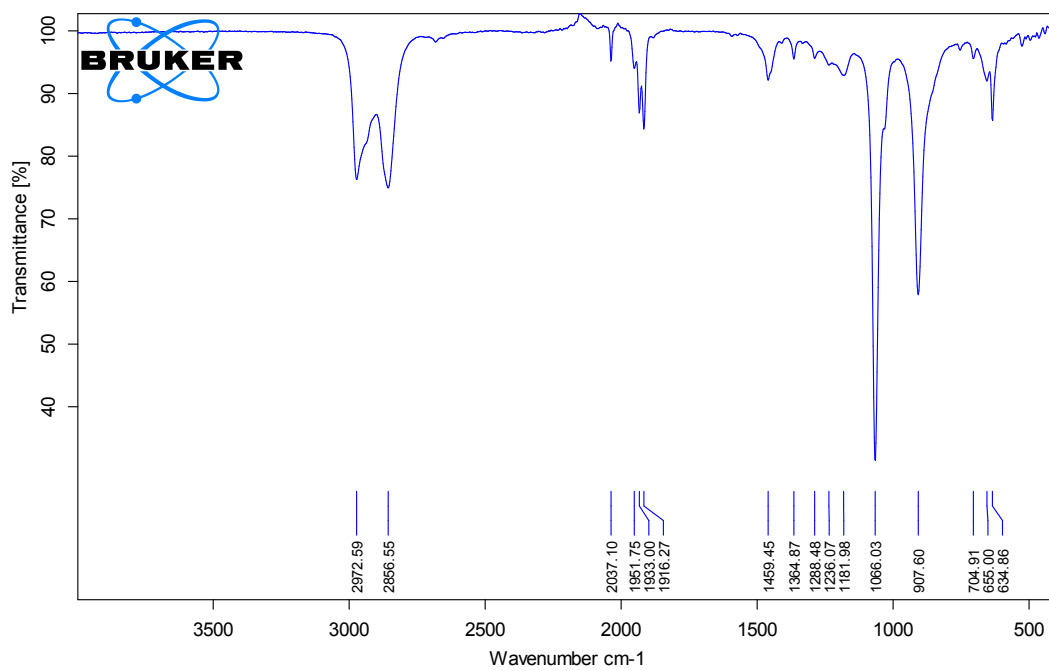

Figure S13. IR spectra of  $[\text{Fe}(\text{CO})_4(\text{HL})]$  (8): neat solid sample (top) and solution (bottom).

## 4. C-C coupling reaction

### Scheme S1. C-C bond formation reaction.

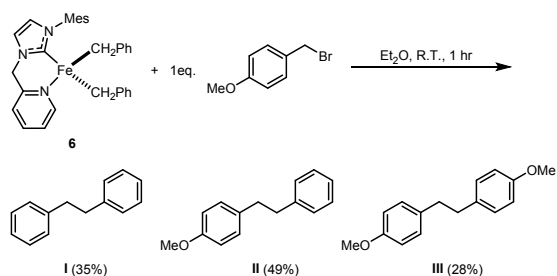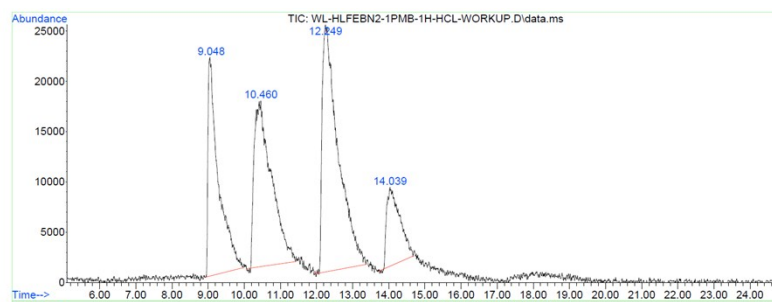

| peak # | R.T. min | first scan | max scan | last scan | PK TY | peak height | corr. area | corr. % max. | % of total |
|--------|----------|------------|----------|-----------|-------|-------------|------------|--------------|------------|
| 1      | 9.048    | 565        | 582      | 719       | BB 4  | 21670       | 4346752    | 57.91%       | 22.498     |
| 2      | 10.460   | 733        | 790      | 932       | BB 3  | 16487       | 5493857    | 73.19%       | 28.435     |
| 3      | 12.249   | 1011       | 1054     | 1219      | BV 5  | 24493       | 7506410    | 100.00%      | 38.851     |
| 4      | 14.039   | 1272       | 1318     | 1412      | BV 3  | 7724        | 1973863    | 26.30%       | 10.216     |

Figure S14. GC trace of the CC bond formation reaction mixture run 1. Retention times: C<sub>6</sub>Me<sub>6</sub> 9.048 min, **I** 10.460 min, **II** 12.249 min, **III** 14.039 min. 1.6 mg of C<sub>6</sub>Me<sub>6</sub> was used as internal standard.

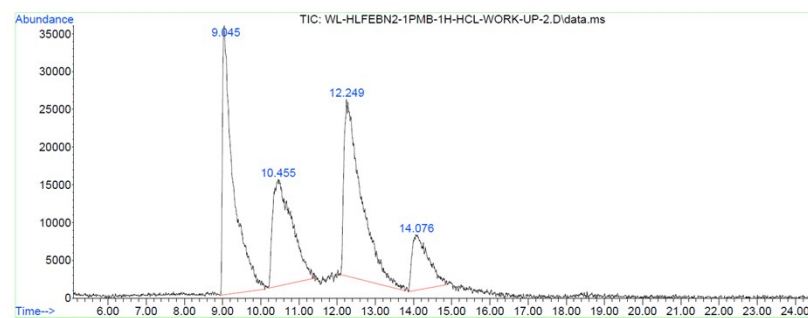

| peak # | R.T. min | first scan | max scan | last scan | PK TY | peak height | corr. area | corr. % max. | % of total |
|--------|----------|------------|----------|-----------|-------|-------------|------------|--------------|------------|
| 1      | 9.045    | 566        | 582      | 739       | EV 3  | 35589       | 6987122    | 94.24%       | 32.443     |
| 2      | 10.455   | 752        | 790      | 929       | M3    | 14155       | 4964872    | 66.97%       | 23.053     |
| 3      | 12.249   | 1030       | 1054     | 1280      | BV 4  | 23197       | 7414024    | 100.00%      | 34.426     |
| 4      | 14.076   | 1293       | 1323     | 1443      | FV 6  | 7195        | 2170297    | 29.27%       | 10.077     |

Figure S14. GC trace of the CC bond formation reaction mixture run 2. Retention times: C<sub>6</sub>Me<sub>6</sub> 9.045 min, **I** 10.455 min, **II** 12.249 min, **III** 14.076 min. 2.6 mg of C<sub>6</sub>Me<sub>6</sub> was used as internal standard.

### Yield Calculations for run 1:

Compound **6** (17.7mg, 34.4  $\mu\text{mol}$ ), *p*-methoxybenzyl bromide (5  $\mu\text{L}$ , 34.3  $\mu\text{mol}$ ),  $\text{C}_6\text{Me}_6$  (1.6 mg, 9.9  $\mu\text{mol}$ )

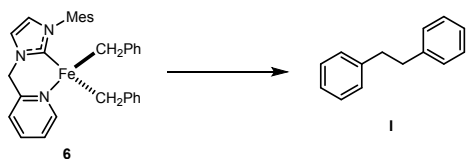

$$n(\text{I}) = \frac{5493857}{4346752} \times 9.9 \mu\text{mol} = 12.5 \mu\text{mol} \quad \% \text{yield} = \frac{12.5 \mu\text{mol}}{34.4 \mu\text{mol}} = 36\%$$

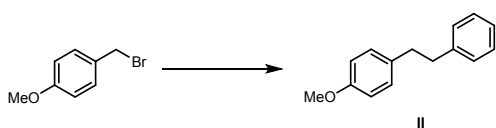

$$n(\text{II}) = \frac{7506410}{4346752} \times 9.9 \mu\text{mol} = 17.0 \mu\text{mol} \quad \% \text{yield} = \frac{17.0 \mu\text{mol}}{34.3 \mu\text{mol}} = 49\%$$

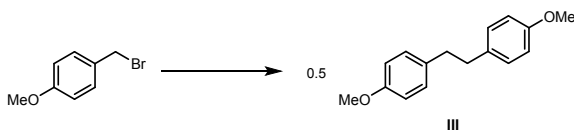

$$n(\text{III}) = \frac{1973863}{4346752} \times 9.9 \mu\text{mol} = 4.5 \mu\text{mol} \quad \% \text{yield} = \frac{4.5 \mu\text{mol} \times 2}{34.4 \mu\text{mol}} = 26\%$$

Conversion of *p*-methoxybenzyl bromide: 49% + 26% = 75%

## Yield Calculations for run 2:

Compound **6** (17.7mg, 34.4  $\mu\text{mol}$ ), *p*-methoxybenzyl bromide (5  $\mu\text{L}$ , 34.3  $\mu\text{mol}$ ),  $\text{C}_6\text{Me}_6$  (2.6 mg, 16.0  $\mu\text{mol}$ )

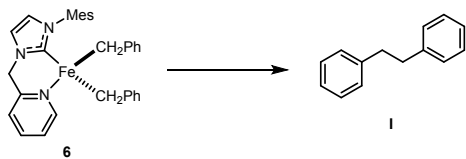

$$n(\text{I}) = \frac{4964872}{6987122} \times 16.0 \mu\text{mol} = 11.4 \mu\text{mol} \quad \% \text{yield} = \frac{11.4 \mu\text{mol}}{34.4 \mu\text{mol}} = 33\%$$

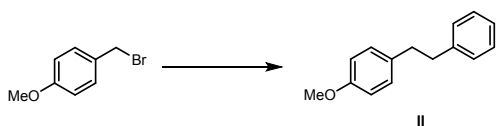

$$n(\text{II}) = \frac{7414024}{6987122} \times 16.0 \mu\text{mol} = 17.0 \mu\text{mol} \quad \% \text{yield} = \frac{17.0 \mu\text{mol}}{34.3 \mu\text{mol}} = 49\%$$

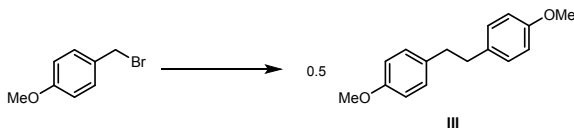

$$n(\text{III}) = \frac{2170297}{6987122} \times 16.0 \mu\text{mol} = 5.0 \mu\text{mol} \quad \% \text{yield} = \frac{5.0 \mu\text{mol} \times 2}{34.3 \mu\text{mol}} = 29\%$$

Conversion of *p*-methoxybenzyl bromide:  $49\% + 29\% = 78\%$

Average yield of **I** =  $(36\% + 33\%) / 2 = 35\%$

Average yield of **II** =  $(49\% + 49\%) / 2 = 49\%$

Average yield of **III** =  $(26\% + 29\%) / 2 = 28\%$

Average conversion of *p*-methoxybenzyl bromide =  $(75\% + 78\%) / 2 = 77\%$

## 5. References:

1. Apex 2 Software Package; Bruker AXS Inc., Madison, WI, 2013. 6.
2. Sheldrick, G. M. *Acta Crystallogr.*, Sect. A: Found. Crystallogr. **2008**, *64*, 112.
3. <http://shelx.uni-ac.gwdg.de/SHELX/index.php> (accessed on July 4, 2013 and September 4, 2015).
4. Spek, A. L. *J. Appl. Crystallogr.* **2003**, *36*, 7.
